# Supplementary material
Source: Springer Nature journal article supplement (https://www.springermedizin.de/resource/supplementary/12961_2002_1_MOESM1_ESM.pdf/9570802)
Supplement: MOESM1 [file 9570802]

| Variables                                  | Indicators                                                                                                                                                                                                                                                                                                                                                                                                                                               |
|--------------------------------------------|----------------------------------------------------------------------------------------------------------------------------------------------------------------------------------------------------------------------------------------------------------------------------------------------------------------------------------------------------------------------------------------------------------------------------------------------------------|
| Institutional/country context              | <ul style="list-style-type: none"> <li>Country per capita income</li> <li>HPSR researchers per million population</li> <li>HPSR project funding as % of total health expenditure</li> </ul>                                                                                                                                                                                                                                                              |
| Institutional characteristics and capacity | <ul style="list-style-type: none"> <li>Legal status: Public, private, mixed</li> <li>Years of experience</li> <li>Experience of director/leader</li> <li>Career development incentives</li> <li>Access to information technology</li> <li>Total full time equivalent (FTE) researchers</li> <li>Actual full time participation</li> <li>% of researchers with PhD</li> <li>Project funding per researcher</li> <li>Size of research portfolio</li> </ul> |
| Attainment of critical mass                | <ul style="list-style-type: none"> <li>Number of researchers per institution</li> <li>Number of PhDs in workforce</li> <li>Presence of key disciplines</li> <li>Disciplines' highest qualification</li> </ul>                                                                                                                                                                                                                                            |
| Knowledge production process               | <ul style="list-style-type: none"> <li>Duration of projects</li> <li>No. of projects initiated per year</li> <li>Researchers per project</li> <li>Average total project funding</li> <li>Average annual project funding</li> <li>Capacity development activities</li> </ul>                                                                                                                                                                              |
| Engagement with stakeholders               | <ul style="list-style-type: none"> <li>Consultation process</li> <li>Research initiation process</li> <li>Sources of project funding</li> <li>Engagement with policy makers</li> </ul>                                                                                                                                                                                                                                                                   |
